# Supplementary material
Source: PubMed Central journal article supplement (PMC3982697)
Supplement: 0de756a011d4139cfaf6854606c91434_genetics.113.158824-3.pdf [file 0de756a011d4139cfaf6854606c91434_genetics.113.158824-3.pdf]

**Table S3 Oligonucleotides used in this study**

| Oligo # | Sequence                       | Name             |
|---------|--------------------------------|------------------|
| oLP1965 | CCA CTG GTG GTA GAG CCC CAA G  | H3K14R sense     |
| oLP1966 | CTT GGG GCT CTA CCA CCA GTG G  | H3K14R antisense |
| oLP1969 | CAA TTA GCC TCC AGG GCT GCC AG | H3K23R sense     |
| oLP1970 | CTG GCA GCC CTG GAG GCT AAT TG | H3K23R antisense |
| oLP1985 | CAA TTA GCC TCC GCG GCT GCC AG | H3K23A sense     |
| oLP1986 | CTG GCA GCC GCG GAG GCT AAT TG | H3K23A antisense |

Supplemental Literature Cited

Ahn, S.H., W.L. Cheung, J.Y. Hsu, R.L. Diaz, M.M. Smith *et al.*, 2005 Sterile 20 kinase phosphorylates histone H2B at serine 10 during hydrogen peroxide-induced apoptosis in *S. cerevisiae*. *Cell* 120: 25-36.

Mrsa, V., F. Klebl, and W. Tanner, 1993 Purification and characterization of the *Saccharomyces cerevisiae* *BGL2* gene product, a cell wall endo-beta-1,3-glucanase. *J. Bacteriol.* 175: 2102-2106.

Ragni, E., T. Fontaine, C. Gissi, J.P. Latge, and L. Popolo, 2007 The Gas family of proteins in *Saccharomyces cerevisiae*: characterization and evolutionary analysis. *Yeast* 24: 297-308.
