# Supplementary material
Source: PubMed Central journal article supplement (PMC3982697)
Supplement: 2cb365fc77b1744fd4a9fd1a3e6c800d_genetics.113.158824-9.pdf [file 2cb365fc77b1744fd4a9fd1a3e6c800d_genetics.113.158824-9.pdf]

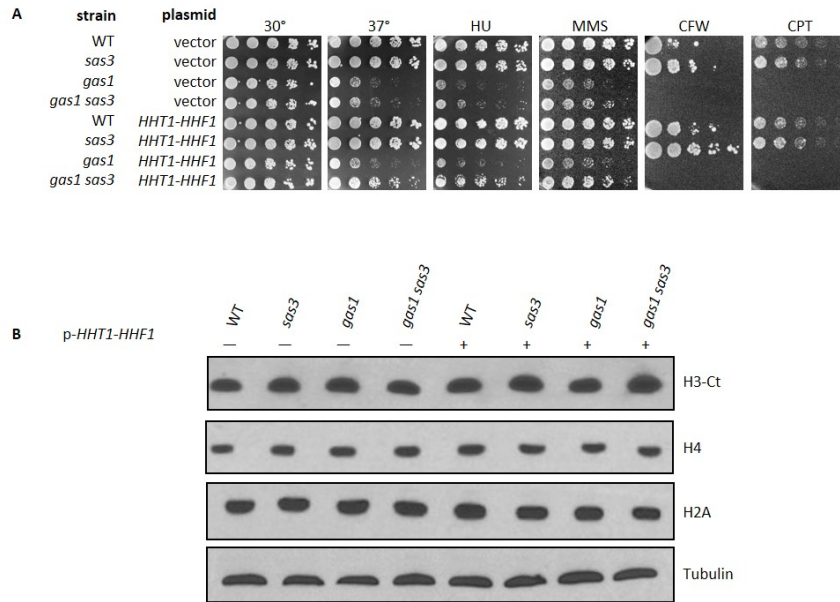

**Figure S5** Suppression of *gas1* phenotypes by deletion of *SAS3* is at least partially dependent on the presence of *HHT1-HHF1*. (A) Diminished suppression by deletion of *SAS3* is observed in the histone mutant background deleted for *HHT1-HHF1*. Suppression is restored when the *HHT1-HHF1* locus is provided on a CEN plasmid in the *gas1 sas3* double mutant. (B) However, this is not due to global changes in histone levels. Genotoxin and growth conditions are the same as in Figure S4. Strains are as in Figure S4, except those carrying the p-*HHT1-HHF1* (pLP3145), which also have *HHT2-HHF2* (pLP1775). Strains plated in (A) were subsequently used for analysis in (B). The immunoblot was probed with anti-H3-Ct (1:10000; Millipore), anti-H4 (1:10000; Millipore), anti-H2A (1:5000; Abcam) and anti-tubulin (1:10000; Bond *et al.* 1986) as a loading control.
