# Supplementary material
Source: PubMed Central journal article supplement (PMC3982697)
Supplement: 5de5f5c58566a66d7b2c0a6b17492036_genetics.113.158824-10.pdf [file 5de5f5c58566a66d7b2c0a6b17492036_genetics.113.158824-10.pdf]

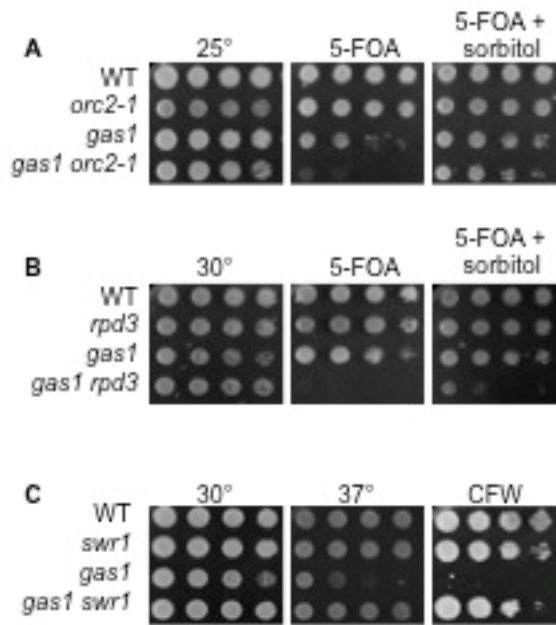

**Figure S1** The synthetic lethality of *gas1* with *orc2-1* or *rpd3* is at least partially rescued by sorbitol, whereas deletion of *SWR1* rescued both *gas1* temperature and CFW sensitivities. (A) Wild type (LPY10266), *orc2-1* (LPY10267), *gas1* (LPY10271) and *gas1 orc2-1* covered by p-*GAS1* (LPY10270) were plated on SC or SC with 5-FOA, to counterselect p-*GAS1*, *URA3*, with or without 1M sorbitol at 25°. (B) Wild type (LPY4196), *rpd3* (LPY14355), *gas1* (LPY19200), *gas1 rpd3* covered by p-*GAS1*, *URA3* (LPY15695) were plated at 30° on SC and SC with 5-FOA, to counterselect p-*GAS1*, *URA3*, with or without 1M sorbitol. (C) Wild type (LPY5), *swr1* (LPY16104), *gas1* (LPY10129) and *gas1 swr1* (LPY17161) were plated on SC at 30°, 37°, and SC with CFW at 30°.
