# Supplementary material
Source: PubMed Central journal article supplement (PMC3982697)
Supplement: 99e0d0447d6b0d53924666bf2ad5e400_genetics.113.158824-8.pdf [file 99e0d0447d6b0d53924666bf2ad5e400_genetics.113.158824-8.pdf]

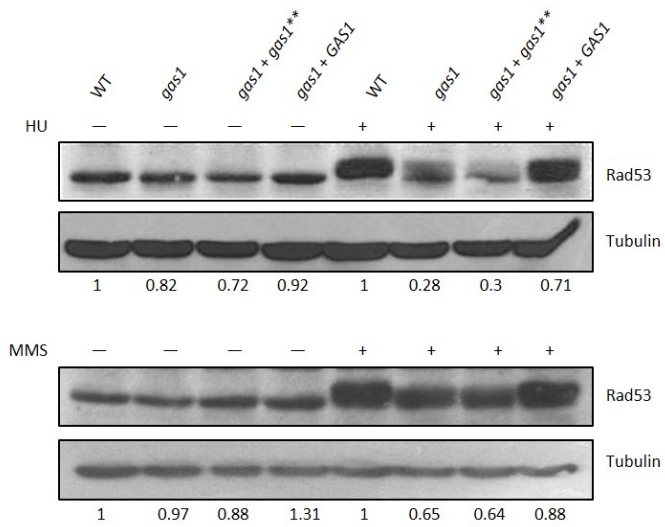

**Figure S6** Reduction of Rad53 protein levels and phosphorylation isoforms is dependent on the  $\beta$ -1,3-glucanoyltransferase activity of Gas1. Wild type (LPY5), *gas1* (LPY10129), *gas1* + p-*gas1*\*\* (LPY12251) and *gas1* + p-*GAS1* (LPY122326) were treated with HU or MMS. Whole cell lysates were separated on 8% SDS-PAGE and probed with anti-Rad53 followed by anti-tubulin as loading control, as done for Figure 5.
