# Supplementary material
Source: PubMed Central journal article supplement (PMC3982697)
Supplement: 612b9f1b77553c63ed102d2bbf14c768_genetics.113.158824-6.pdf [file 612b9f1b77553c63ed102d2bbf14c768_genetics.113.158824-6.pdf]

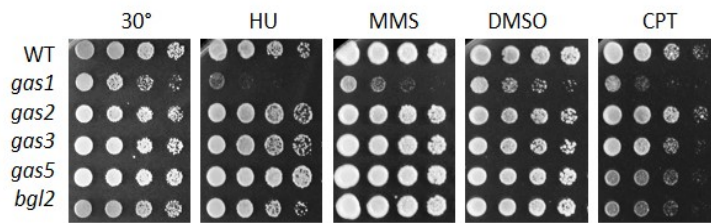

**Figure S3** Genotoxin sensitivity is not a common feature of the *GAS* family or cell wall disruption. Wild type (LPY5), *gas1* (LPY10129), *gas2* (LPY10047), *gas3* (LPY10051), *gas5* (LPY11544) and *bgl2* (LPY13102) were plated on SC or SC with HU, MMS or CPT, with DMSO as a control, and incubated at 30°. Among the five-membered *GAS* family, *GAS2*, like *GAS4* (not shown) is expressed meiotically, whereas *GAS1*, *GAS3*, and *GAS5* are vegetatively expressed (Ragni *et al.* 2007). *BGL2* encodes a cell wall endo- $\beta$ -1,3-glucanase (Mrsa *et al.* 1993).
