# Supplementary material
Source: PubMed Central journal article supplement (PMC3982697)
Supplement: 896aa926c6f9fd76b645f3c0979d87a5_genetics.113.158824-7.pdf [file 896aa926c6f9fd76b645f3c0979d87a5_genetics.113.158824-7.pdf]

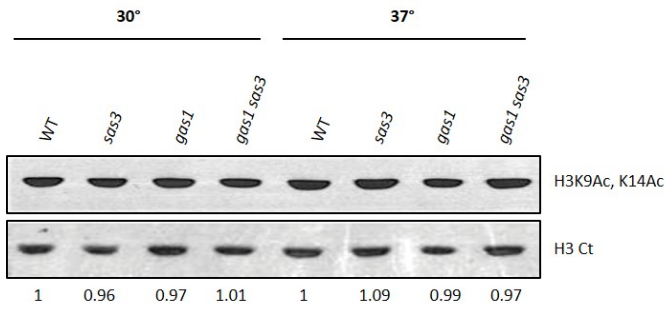

**Figure S2** Neither *gas1* nor *gas1 sas3* have significantly reduced global levels of H3K9Ac, K14Ac. Whole cell lysates from wild type (LPY5), *sas3* (LPY8256), *gas1* (LPY10129) and *gas1 sas3* (LPY17520) were separated on 18% SDS-PAGE after growth at either 30° or 37° and probed with anti-H3K9Ac, K14Ac (1:10000; Millipore). Blots were reprobed with anti-H3 C-terminal (Ct) (1:10000; Millipore) as a loading control.
