# Supplementary material
Source: PubMed Central journal article supplement (PMC3982697)
Supplement: 3821b5855e0a3c7dcd3cd1917338dcd2_genetics.113.158824-5.pdf [file 3821b5855e0a3c7dcd3cd1917338dcd2_genetics.113.158824-5.pdf]

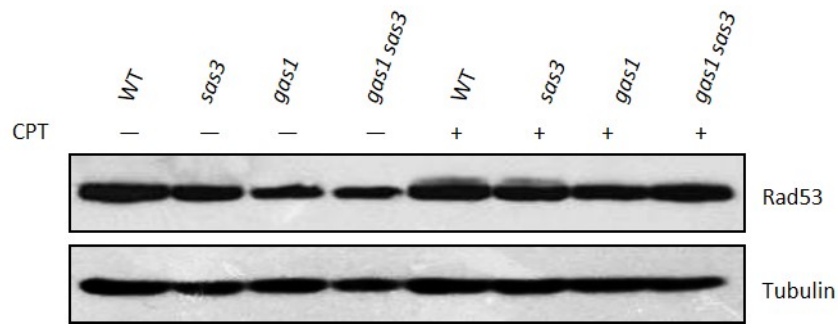

**Figure S7** Rad53 is only minimally, if at all, phosphorylated following exposure to CPT as previously reported (Redon *et al.* 2003). Strains and treatment are the same as in Figure 5.
