# Supplementary material
Source: PubMed Central journal article supplement (PMC3982697)
Supplement: 8623ee8f3abc54ef6902527fa8813100_genetics.113.158824-1.pdf [file 8623ee8f3abc54ef6902527fa8813100_genetics.113.158824-1.pdf]

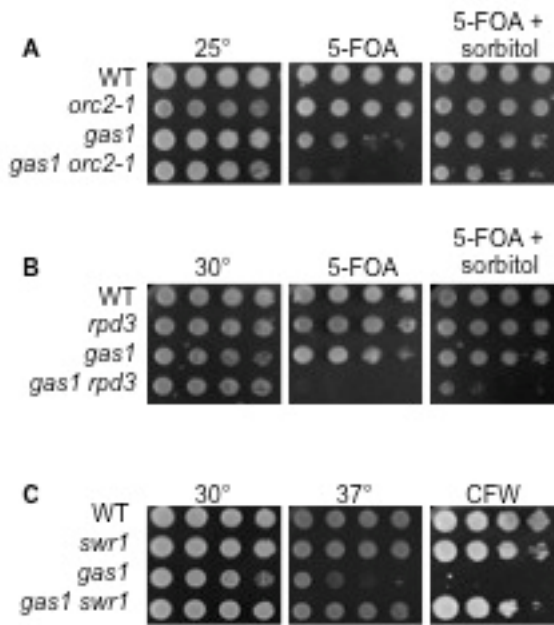

**Figure S1** The synthetic lethality of *gas1* with *orc2-1* or *rdp3* is at least partially rescued by sorbitol, whereas deletion of *SWR1* rescued both *gas1* temperature and CFW sensitivities. (A) Wild type (LPY10266), *orc2-1* (LPY10267), *gas1* (LPY10271) and *gas1 orc2-1* covered by p-*GAS1* (LPY10270) were plated on SC or SC with 5-FOA, to counterselect p-*GAS1*, *URA3*, with or without 1M sorbitol at 25°. (B) Wild type (LPY4196), *rdp3* (LPY14355), *gas1* (LPY19200), *gas1 rdp3* covered by p-*GAS1*, *URA3* (LPY15695) were plated at 30° on SC and SC with 5-FOA, to counterselect p-*GAS1*, *URA3*, with or without 1M sorbitol. (C) Wild type (LPY5), *swr1* (LPY16104), *gas1* (LPY10129) and *gas1 swr1* (LPY17161) were plated on SC at 30°, 37°, and SC with CFW at 30°.

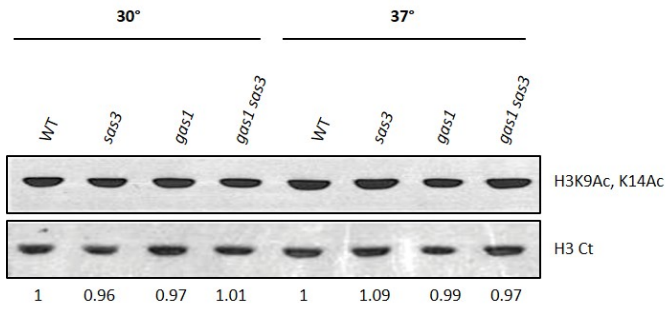

**Figure S2** Neither *gas1* nor *gas1 sas3* have significantly reduced global levels of H3K9Ac, K14Ac. Whole cell lysates from wild type (LPY5), *sas3* (LPY8256), *gas1* (LPY10129) and *gas1 sas3* (LPY17520) were separated on 18% SDS-PAGE after growth at either 30° or 37° and probed with anti-H3K9Ac, K14Ac (1:10000; Millipore). Blots were reprobed with anti-H3 C-terminal (Ct) (1:10000; Millipore) as a loading control.

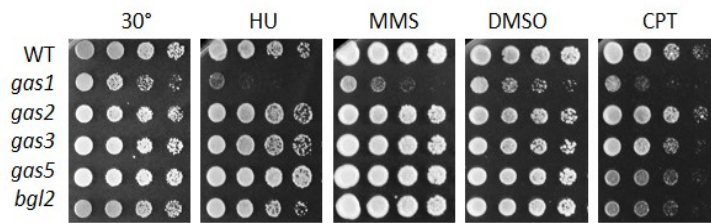

**Figure S3** Genotoxin sensitivity is not a common feature of the *GAS* family or cell wall disruption. Wild type (LPY5), *gas1* (LPY10129), *gas2* (LPY10047), *gas3* (LPY10051), *gas5* (LPY11544) and *bgl2* (LPY13102) were plated on SC or SC with HU, MMS or CPT, with DMSO as a control, and incubated at 30°. Among the five-membered *GAS* family, *GAS2*, like *GAS4* (not shown) is expressed meiotically, whereas *GAS1*, *GAS3*, and *GAS5* are vegetatively expressed (Ragni *et al.* 2007). *BGL2* encodes a cell wall endo- $\beta$ -1,3-glucanase (Mrsa *et al.* 1993).

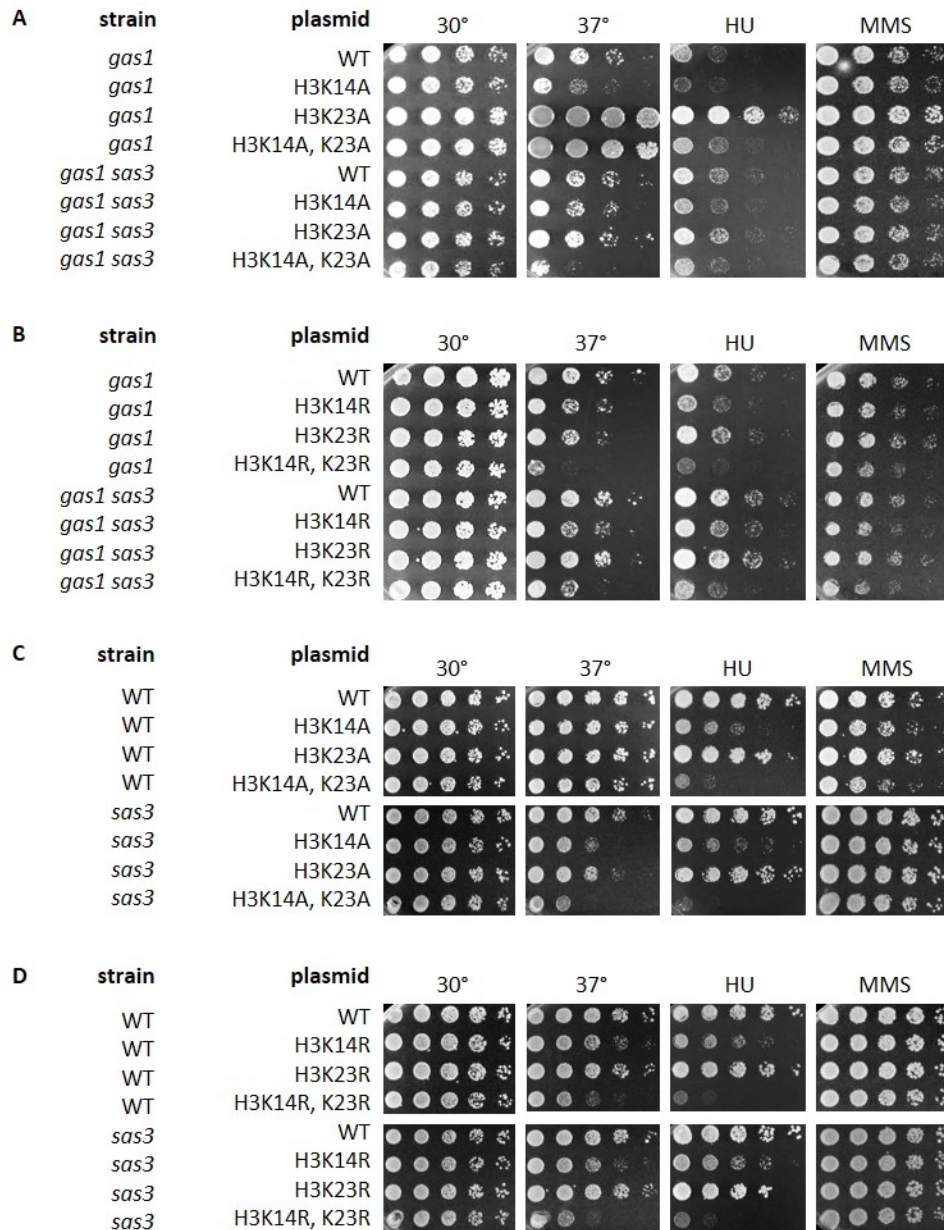

**Figure S4** H3K23A mutants suppress *gas1* temperature and DNA damage sensitivity phenotypes. (A) H3K23A mutant in *gas1* rescues temperature, HU and MMS sensitivity. This suppression is decreased in the absence of *SAS3* as well as in the double mutant H3K14A, K23A. (B) Mutation of the same single residues to arginine does not alter phenotypes of either *gas1* or *gas1 sas3* yet, as in A, the double mutant exacerbates the phenotypes. (C/D) Wild type and *sas3* controls analyzed as in A and B. Although phenotypes are similar to wild type, *sas3* decreased growth at elevated temperature. For these experiments *gas1* (LPY18343), *gas1 sas3* (LPY19878), wild type (LPY12242) and *sas3* (LPY16432) were freshly transformed with indicated histone mutants and struck out on 5-FOA to select against the covering wild type plasmid (pJH33; Ahn *et al.* 2005). Transformations were performed with plasmids containing wild type H3-H4 (*HHT2-HHF2*; pLP1775), H3K14A (pLP1777), H3K23A (pLP3086), H3K14A, K23A (pLP3078), H3K14R (pLP3018), H3K23R (pLP3050) and H3K14R, K23R (pLP3064). Mutants were generated with site-directed mutagenesis with oligonucleotides listed in Table S3.

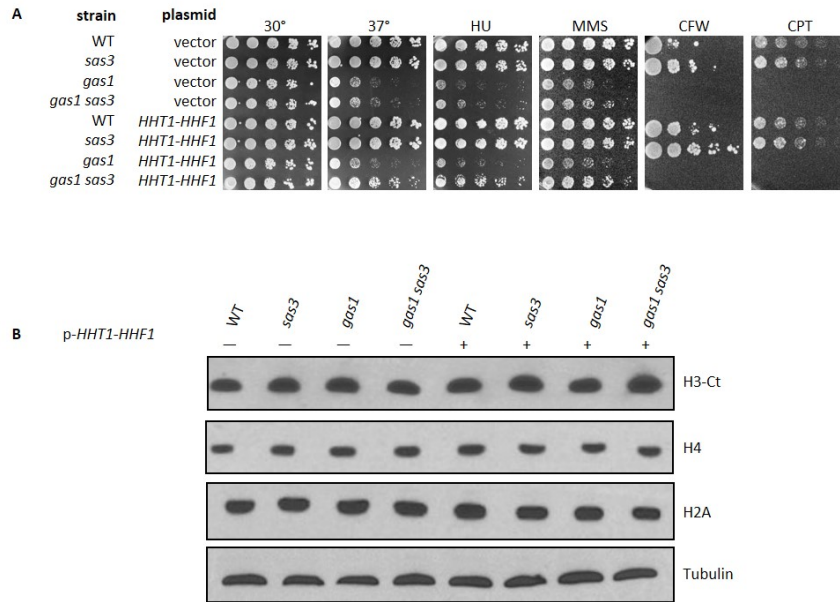

**Figure S5** Suppression of *gas1* phenotypes by deletion of *SAS3* is at least partially dependent on the presence of *HHT1-HHF1*. (A) Diminished suppression by deletion of *SAS3* is observed in the histone mutant background deleted for *HHT1-HHF1*. Suppression is restored when the *HHT1-HHF1* locus is provided on a CEN plasmid in the *gas1 sas3* double mutant. (B) However, this is not due to global changes in histone levels. Genotoxin and growth conditions are the same as in Figure S4. Strains are as in Figure S4, except those carrying the p-*HHT1-HHF1* (pLP3145), which also have *HHT2-HHF2* (pLP1775). Strains plated in (A) were subsequently used for analysis in (B). The immunoblot was probed with anti-H3-Ct (1:10000; Millipore), anti-H4 (1:10000; Millipore), anti-H2A (1:5000; Abcam) and anti-tubulin (1:10000; Bond *et al.* 1986) as a loading control.

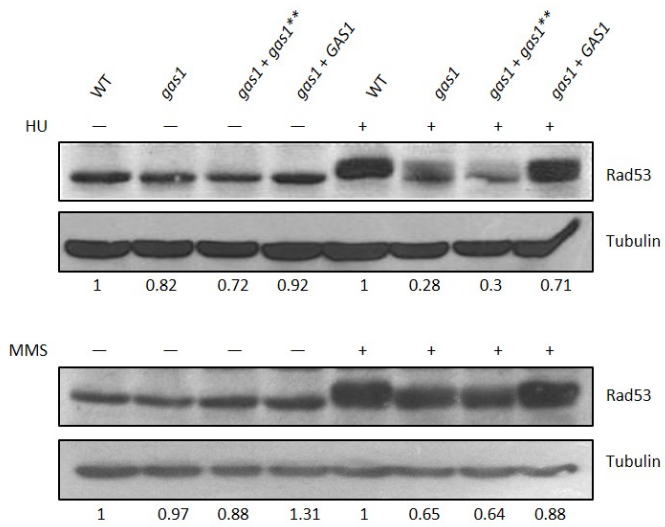

**Figure S6** Reduction of Rad53 protein levels and phosphorylation isoforms is dependent on the  $\beta$ -1,3-glucanoyltransferase activity of Gas1. Wild type (LPY5), *gas1* (LPY10129), *gas1* + p-*gas1*\*\* (LPY12251) and *gas1* + p-*GAS1* (LPY122326) were treated with HU or MMS. Whole cell lysates were separated on 8% SDS-PAGE and probed with anti-Rad53 followed by anti-tubulin as loading control, as done for Figure 5.

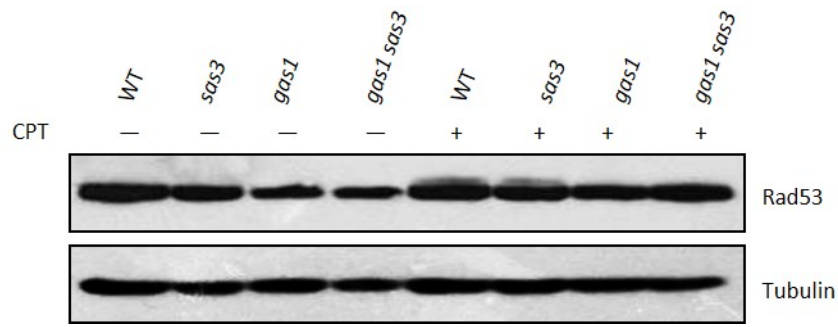

**Figure S7** Rad53 is only minimally, if at all, phosphorylated following exposure to CPT as previously reported (Redon *et al.* 2003). Strains and treatment are the same as in Figure 5.

**Table S1 Yeast strains used in this study**

| Strain         | Genotype                                                                                 | Source       |
|----------------|------------------------------------------------------------------------------------------|--------------|
| LPY5 (W303-1a) | <i>MATa ade2-1 can1-100 his3-11,15 leu2-3,112 trp1-1 ura3-1</i>                          | R. Rothstein |
| LPY1597        | W303 <i>MATa sas2Δ::TRP1</i>                                                             |              |
| LPY2444        | <i>MATα his3Δ200 leu2Δ1 ura3-52</i> with rDNA Ty mURA insert                             | J.S. Smith   |
| LPY2447        | <i>MATα his3Δ200 leu2Δ1 ura3-52</i> with rDNA Ty mURA insert <i>sir2Δ2::HIS3</i>         | J.S. Smith   |
| LPY4196        | LPY5 + pLP60                                                                             |              |
| LPY4924        | W303 <i>MATa hmr::TRP1 TELVR::URA3</i>                                                   |              |
| LPY5035        | W303 <i>MATa sir2Δ::HIS3 hmr::TRP1 TELVR::URA3</i>                                       |              |
| LPY5526        | W303 <i>MATa yng1Δ::HIS3 rDNA::ADE2-CAN1 TELVR::URA3</i>                                 |              |
| LPY6285        | W303 <i>MATa rDNA::ADE2-CAN1 TELVR::URA3</i>                                             | K. Runge     |
| LPY6439        | W303 <i>MATa ada2Δ::kanMX</i>                                                            | R. Rothstein |
| LPY8242        | W303 <i>MATa gcn5Δ::HIS3</i>                                                             |              |
| LPY8256        | W303 <i>MATa sas3Δ::HIS3</i>                                                             |              |
| LPY9820        | W303 <i>MATa gas1Δ::kanMX rDNA::ADE2-CAN1 TELVR::URA3</i>                                |              |
| LPY10047       | W303 <i>MATa rDNA::ADE2-CAN1 hmr::TRP1 gas2Δ::kanMX</i>                                  |              |
| LPY10051       | W303 <i>MATa rDNA::ADE2-CAN1 hmr::TRP1 gas3Δ::kanMX</i>                                  |              |
| LPY10074       | <i>MATα his3Δ200 leu2Δ1 ura3-52</i> with rDNA Ty mURA insert <i>gas1Δ::kanMX</i>         |              |
| LPY10129       | <i>MATa ade2-1 can1-100 his3-11,15 leu2-3,112 trp1-1 ura3-1 gas1Δ::kanMX</i>             |              |
| LPY10266       | W303 <i>MATα rDNA::CAN:ADE2</i> + pLP1823                                                |              |
| LPY10267       | W303 <i>MATα orc2-1 rDNA::CAN:ADE2</i> + pLP1823                                         |              |
| LPY10270       | W303 <i>MATα gas1Δ::kanMX orc2-1 rDNA::CAN:ADE2</i> + pLP1823                            |              |
| LPY10271       | W303 <i>MATα gas1Δ::kanMX orc2-1 rDNA::CAN:ADE2</i> + pLP1823                            |              |
| LPY11544       | W303 <i>MATa gas3Δ::kanMX rDNA::CAN:ADE2 hmr::TRP1</i>                                   |              |
| LPY12232       | W303 <i>MATa hht1-hhf1Δ::kanMX hht2-hhf2Δ::kanMX hta2-htb2Δ::HPH</i> + pJH33             | M.M. Smith   |
| LPY12247       | LPY10129 + pLP135                                                                        |              |
| LPY12251       | LPY10129 + pLP2114                                                                       |              |
| LPY12264       | W303 <i>MATa rDNA::CAN:ADE2 hmr::TRP1 gcn5Δ::NatMX</i>                                   |              |
| LPY12326       | LPY10129 + pLP1951                                                                       |              |
| LPY13102       | W303 <i>MATa rDNA::CAN:ADE2 hmr::TRP1 bgl2Δ::kanMX</i>                                   |              |
| LPY14355       | W303 <i>MATa rpd3Δ::kanMX</i> + pLP60                                                    |              |
| LPY15695       | W303 <i>MATa gas1Δ::kanMX rpd3Δ::kanMX</i> + pLP60 + pLP1823                             |              |
| LPY16039       | W303 <i>MATa sas3Δ::HIS3</i>                                                             |              |
| LPY16104       | W303 <i>MATa swr1Δ::kanMX</i>                                                            |              |
| LPY16432       | W303 <i>MATa hht1-hhf1Δ::kanMX hht2-hhf2Δ::kanMX hta2-htb2Δ::HPH sas3Δ::HIS3</i> + pJH33 |              |
| LPY16444       | W303 <i>MATa sas3Δ::HIS3 hmr::TRP1 TELVR::URA3</i>                                       |              |
| LPY16736       | W303 <i>MATa gas1Δ::kanMX gcn5Δ::HIS3</i> + pLP1640                                      |              |
| LPY16798       | W303 <i>MATa gas1Δ::kanMX gcn5Δ::HIS3</i> + pLP 1640 + pLP 135                           |              |
| LPY16800       | W303 <i>MATa gas1Δ::kanMX gcn5Δ::HIS3</i> + pLP 1640 + pLP 1950                          |              |



|          |                                                                                                       |             |
|----------|-------------------------------------------------------------------------------------------------------|-------------|
| LPY16801 | W303 MATa <i>gas1Δ::kanMX gcn5Δ::HIS3</i> + pLP 1640 + pLP 2114                                       |             |
| LPY16914 | W303 MATa <i>spt20Δ::HIS3</i>                                                                         | D. Stillman |
| LPY16997 | W303 MATa <i>gas1Δ::kanMX yng1Δ::HIS3 rDNA::ADE2-CAN1 TELVR::URA3</i>                                 |             |
| LPY17161 | W303 MATa <i>swr1Δ::kanMX gas1Δ::kanMX TELVR::URA3</i>                                                |             |
| LPY17370 | W303 MATa <i>ahc1Δ::kanMX</i>                                                                         |             |
| LPY17685 | MATa <i>his3Δ200 leu2Δ1 ura3-52</i> with rDNA Ty mURA insert <i>gas1Δ::kanMX sas3Δ::HIS3</i>          |             |
| LPY18050 | LPY5 + pLP 135                                                                                        |             |
| LPY18081 | LPY10129 + pLP 135                                                                                    |             |
| LPY18206 | W303 MATa <i>rtg2Δ::kanMX</i>                                                                         |             |
| LPY18343 | W303 MATa <i>hht1-hhf1Δ::kanMX hht2-hhf2Δ::kanMX hta2-htb2Δ::HPH gas1Δ::kanMX</i> + pJH33             |             |
| LPY18372 | W303 MATa <i>gas1Δ::kanMX rtg2Δ::kanMX</i>                                                            |             |
| LPY18518 | W303 MATa <i>ahc2Δ::kanMX</i>                                                                         |             |
| LPY19101 | W303 MATa <i>gas1Δ::kanMX gcn5Δ::HIS3 sas3Δ::HIS3</i> + pLP 1640                                      |             |
| LPY19200 | LPY10129 + plp60                                                                                      |             |
| LPY19272 | W303 MATa <i>gas1Δ::kanMX ada2Δ::kanMX</i>                                                            |             |
| LPY19414 | W303 MATa <i>gas1Δ::kanMX ahc2Δ::kanMX</i>                                                            |             |
| LPY19467 | W303 MATa <i>gas1Δ::kanMX ahc1Δ::kanMX</i>                                                            |             |
| LPY19630 | W303 MATa <i>gas1Δ::kanMX spt20Δ::HIS3</i>                                                            |             |
| LPY19670 | W303 MATa <i>gas1Δ::kanMX sas2Δ::HIS3</i>                                                             |             |
| LPY19731 | W303 MATa <i>sas3Δ::HIS3 hmr::TRP1 TELVR::URA3</i>                                                    |             |
| LPY19771 | W303 MATa <i>gas1Δ::kanMX sgf73Δ::URA3</i>                                                            |             |
| LPY19773 | W303 MATa <i>gas1Δ::kanMX hmr::TRP1 TELVR::URA3</i>                                                   |             |
| LPY19816 | W303 MATa <i>sgf73Δ::URA3</i>                                                                         |             |
| LPY19823 | W303 MATa <i>gas1Δ::kanMX sas3Δ::HIS3</i>                                                             |             |
| LPY19878 | W303 MATa <i>hht1-hhf1Δ::kanMX hht2-hhf2Δ::kanMX hta2-htb2Δ::HPH sas3Δ::HIS3 gas1Δ::kanMX</i> + pJH33 |             |

---

All strains were constructed during the course of this study or are part of our standard lab collection unless otherwise indicated.

All strains are W303 unless otherwise indicated.

**Table S2 Plasmids used in this study**

| Plasmid | Description                           | Alias  | Source                 |
|---------|---------------------------------------|--------|------------------------|
| pJH33   | <i>HTA1 HTB1 HHF2 HHT2 URA3</i> CEN   |        | Ahn <i>et al.</i> 2005 |
| pLP60   | vector <i>HIS3</i> CEN                | pRS313 |                        |
| pLP135  | vector <i>LEU2</i> 2 $\mu$            | YEP351 |                        |
| pLP1640 | <i>GCN5 URA3</i> CEN                  |        | S. Lo                  |
| pLP1775 | <i>HHT2-HHF2 TRP1</i> CEN             |        | S.L. Berger            |
| pLP1777 | <i>hht2-K14A HHF2 TRP1</i> CEN        |        | S. Lo                  |
| pLP1823 | vector <i>TRP1</i> 2 $\mu$            | pRS424 | C. Nislow              |
| pLP1950 | <i>gcn5-KQL LEU2</i> 2 $\mu$          |        |                        |
| pLP1951 | <i>GAS1 LEU2</i> 2 $\mu$              |        |                        |
| pLP2114 | <i>gas1-E161Q, E262Q LEU2</i> 2 $\mu$ |        |                        |
| pLP3018 | <i>hht2-K14R HHF2 TRP1</i> CEN        |        |                        |
| pLP3050 | <i>hht2-K23R HHF2 TRP1</i> CEN        |        |                        |
| pLP3064 | <i>hht2-K14R, K23R HHF2 TRP1</i> CEN  |        |                        |
| pLP3078 | <i>hht2-K14A, K23A HHF2 TRP1</i> CEN  |        |                        |
| pLP3086 | <i>hht2-K23A HHF2 TRP1</i> CEN        |        |                        |
| pLP3145 | <i>HHT1-HHF1 URA3</i> CEN             |        |                        |

All plasmids were constructed during the course of this study or are part of our standard lab collection unless otherwise indicated.

**Table S3 Oligonucleotides used in this study**

| Oligo # | Sequence                       | Name             |
|---------|--------------------------------|------------------|
| oLP1965 | CCA CTG GTG GTA GAG CCC CAA G  | H3K14R sense     |
| oLP1966 | CTT GGG GCT CTA CCA CCA GTG G  | H3K14R antisense |
| oLP1969 | CAA TTA GCC TCC AGG GCT GCC AG | H3K23R sense     |
| oLP1970 | CTG GCA GCC CTG GAG GCT AAT TG | H3K23R antisense |
| oLP1985 | CAA TTA GCC TCC GCG GCT GCC AG | H3K23A sense     |
| oLP1986 | CTG GCA GCC GCG GAG GCT AAT TG | H3K23A antisense |

#### Supplemental Literature Cited

Ahn, S.H., W.L. Cheung, J.Y. Hsu, R.L. Diaz, M.M. Smith *et al.*, 2005 Sterile 20 kinase phosphorylates histone H2B at serine 10 during hydrogen peroxide-induced apoptosis in *S. cerevisiae*. *Cell* 120: 25-36.

Mrsa, V., F. Klebl, and W. Tanner, 1993 Purification and characterization of the *Saccharomyces cerevisiae* *BGL2* gene product, a cell wall endo-beta-1,3-glucanase. *J. Bacteriol.* 175: 2102-2106.

Ragni, E., T. Fontaine, C. Gissi, J.P. Latge, and L. Popolo, 2007 The Gas family of proteins in *Saccharomyces cerevisiae*: characterization and evolutionary analysis. *Yeast* 24: 297-308.
