# Supplementary material
Source: PubMed Central journal article supplement (PMC3982697)
Supplement: 9617d5969b6626d0c6b844dcfeab389d_genetics.113.158824-11.pdf [file 9617d5969b6626d0c6b844dcfeab389d_genetics.113.158824-11.pdf]

**Table S1 Yeast strains used in this study**

| Strain         | Genotype                                                                                 | Source       |
|----------------|------------------------------------------------------------------------------------------|--------------|
| LPY5 (W303-1a) | <i>MATa ade2-1 can1-100 his3-11,15 leu2-3,112 trp1-1 ura3-1</i>                          | R. Rothstein |
| LPY1597        | W303 <i>MATa sas2Δ::TRP1</i>                                                             |              |
| LPY2444        | <i>MATα his3Δ200 leu2Δ1 ura3-52</i> with rDNA Ty mURA insert                             | J.S. Smith   |
| LPY2447        | <i>MATα his3Δ200 leu2Δ1 ura3-52</i> with rDNA Ty mURA insert <i>sir2Δ2::HIS3</i>         | J.S. Smith   |
| LPY4196        | LPY5 + pLP60                                                                             |              |
| LPY4924        | W303 <i>MATa hmr::TRP1 TELVR::URA3</i>                                                   |              |
| LPY5035        | W303 <i>MATa sir2Δ::HIS3 hmr::TRP1 TELVR::URA3</i>                                       |              |
| LPY5526        | W303 <i>MATa yng1Δ::HIS3 rDNA::ADE2-CAN1 TELVR::URA3</i>                                 |              |
| LPY6285        | W303 <i>MATα rDNA::ADE2-CAN1 TELVR::URA3</i>                                             | K. Runge     |
| LPY6439        | W303 <i>MATα ada2Δ::kanMX</i>                                                            | R. Rothstein |
| LPY8242        | W303 <i>MATα gcn5Δ::HIS3</i>                                                             |              |
| LPY8256        | W303 <i>MATα sas3Δ::HIS3</i>                                                             |              |
| LPY9820        | W303 <i>MATα gas1Δ::kanMX rDNA::ADE2-CAN1 TELVR::URA3</i>                                |              |
| LPY10047       | W303 <i>MATα rDNA::ADE2-CAN1 hmr::TRP1 gas2Δ::kanMX</i>                                  |              |
| LPY10051       | W303 <i>MATα rDNA::ADE2-CAN1 hmr::TRP1 gas3Δ::kanMX</i>                                  |              |
| LPY10074       | <i>MATα his3Δ200 leu2Δ1 ura3-52</i> with rDNA Ty mURA insert <i>gas1Δ::kanMX</i>         |              |
| LPY10129       | <i>MATa ade2-1 can1-100 his3-11,15 leu2-3,112 trp1-1 ura3-1 gas1Δ::kanMX</i>             |              |
| LPY10266       | W303 <i>MATα rDNA::CAN:ADE2</i> + pLP1823                                                |              |
| LPY10267       | W303 <i>MATα orc2-1 rDNA::CAN:ADE2</i> + pLP1823                                         |              |
| LPY10270       | W303 <i>MATα gas1Δ::kanMX orc2-1 rDNA::CAN:ADE2</i> + pLP1823                            |              |
| LPY10271       | W303 <i>MATα gas1Δ::kanMX orc2-1 rDNA::CAN:ADE2</i> + pLP1823                            |              |
| LPY11544       | W303 <i>MATα gas3Δ::kanMX rDNA::CAN:ADE2 hmr::TRP1</i>                                   |              |
| LPY12232       | W303 <i>MATα hht1-hhf1Δ::kanMX hht2-hhf2Δ::kanMX hta2-htb2Δ::HPH</i> + pJH33             | M.M. Smith   |
| LPY12247       | LPY10129 + pLP135                                                                        |              |
| LPY12251       | LPY10129 + pLP2114                                                                       |              |
| LPY12264       | W303 <i>MATα rDNA::CAN:ADE2 hmr::TRP1 gcn5Δ::NatMX</i>                                   |              |
| LPY12326       | LPY10129 + pLP1951                                                                       |              |
| LPY13102       | W303 <i>MATα rDNA::CAN:ADE2 hmr::TRP1 bgl2Δ::kanMX</i>                                   |              |
| LPY14355       | W303 <i>MATα rpd3Δ::kanMX</i> + pLP60                                                    |              |
| LPY15695       | W303 <i>MATα gas1Δ::kanMX rpd3Δ::kanMX</i> + pLP60 + pLP1823                             |              |
| LPY16039       | W303 <i>MATα sas3Δ::HIS3</i>                                                             |              |
| LPY16104       | W303 <i>MATα swr1Δ::kanMX</i>                                                            |              |
| LPY16432       | W303 <i>MATα hht1-hhf1Δ::kanMX hht2-hhf2Δ::kanMX hta2-htb2Δ::HPH sas3Δ::HIS3</i> + pJH33 |              |
| LPY16444       | W303 <i>MATα sas3Δ::HIS3 hmr::TRP1 TELVR::URA3</i>                                       |              |
| LPY16736       | W303 <i>MATα gas1Δ::kanMX gcn5Δ::HIS3</i> + pLP1640                                      |              |
| LPY16798       | W303 <i>MATα gas1Δ::kanMX gcn5Δ::HIS3</i> + pLP 1640 + pLP 135                           |              |
| LPY16800       | W303 <i>MATα gas1Δ::kanMX gcn5Δ::HIS3</i> + pLP 1640 + pLP 1950                          |              |

|          |                                                                                                       |             |
|----------|-------------------------------------------------------------------------------------------------------|-------------|
| LPY16801 | W303 <i>MATa gas1Δ::kanMX gcn5Δ::HIS3</i> + pLP 1640 + pLP 2114                                       |             |
| LPY16914 | W303 <i>MATa spt20Δ::HIS3</i>                                                                         | D. Stillman |
| LPY16997 | W303 <i>MATa gas1Δ::kanMX yng1Δ::HIS3 rDNA::ADE2-CAN1 TELVR::URA3</i>                                 |             |
| LPY17161 | W303 <i>MATa swr1Δ::kanMX gas1Δ::kanMX TELVR::URA3</i>                                                |             |
| LPY17370 | W303 <i>MATa ahc1Δ::kanMX</i>                                                                         |             |
| LPY17685 | <i>MATa his3Δ200 leu2Δ1 ura3-52</i> with rDNA Ty mURA insert <i>gas1Δ::kanMX sas3Δ::HIS3</i>          |             |
| LPY18050 | LPY5 + pLP 135                                                                                        |             |
| LPY18081 | LPY10129 + pLP 135                                                                                    |             |
| LPY18206 | W303 <i>MATa rtg2Δ::kanMX</i>                                                                         |             |
| LPY18343 | W303 <i>MATa hht1-hhf1Δ::kanMX hht2-hhf2Δ::kanMX hta2-htb2Δ::HPH gas1Δ::kanMX</i> + pJH33             |             |
| LPY18372 | W303 <i>MATa gas1Δ::kanMX rtg2Δ::kanMX</i>                                                            |             |
| LPY18518 | W303 <i>MATa ahc2Δ::kanMX</i>                                                                         |             |
| LPY19101 | W303 <i>MATa gas1Δ::kanMX gcn5Δ::HIS3 sas3Δ::HIS3</i> + pLP 1640                                      |             |
| LPY19200 | LPY10129 + plp60                                                                                      |             |
| LPY19272 | W303 <i>MATa gas1Δ::kanMX ada2Δ::kanMX</i>                                                            |             |
| LPY19414 | W303 <i>MATa gas1Δ::kanMX ahc2Δ::kanMX</i>                                                            |             |
| LPY19467 | W303 <i>MATa gas1Δ::kanMX ahc1Δ::kanMX</i>                                                            |             |
| LPY19630 | W303 <i>MATa gas1Δ::kanMX spt20Δ::HIS3</i>                                                            |             |
| LPY19670 | W303 <i>MATa gas1Δ::kanMX sas2Δ::HIS3</i>                                                             |             |
| LPY19731 | W303 <i>MATa sas3Δ::HIS3 hmr::TRP1 TELVR::URA3</i>                                                    |             |
| LPY19771 | W303 <i>MATa gas1Δ::kanMX sgf73Δ::URA3</i>                                                            |             |
| LPY19773 | W303 <i>MATa gas1Δ::kanMX hmr::TRP1 TELVR::URA3</i>                                                   |             |
| LPY19816 | W303 <i>MATa sgf73Δ::URA3</i>                                                                         |             |
| LPY19823 | W303 <i>MATa gas1Δ::kanMX sas3Δ::HIS3</i>                                                             |             |
| LPY19878 | W303 <i>MATa hht1-hhf1Δ::kanMX hht2-hhf2Δ::kanMX hta2-htb2Δ::HPH sas3Δ::HIS3 gas1Δ::kanMX</i> + pJH33 |             |

---

All strains were constructed during the course of this study or are part of our standard lab collection unless otherwise indicated.

All strains are W303 unless otherwise indicated.
