# Supplementary material
Source: PubMed Central journal article supplement (PMC3982697)
Supplement: eeb7d13163ea062d0e2d5d7f58228a98_genetics.113.158824-4.pdf [file eeb7d13163ea062d0e2d5d7f58228a98_genetics.113.158824-4.pdf]

**Table S2 Plasmids used in this study**

| Plasmid | Description                           | Alias  | Source                 |
|---------|---------------------------------------|--------|------------------------|
| pJH33   | <i>HTA1 HTB1 HHF2 HHT2 URA3</i> CEN   |        | Ahn <i>et al.</i> 2005 |
| pLP60   | vector <i>HIS3</i> CEN                | pRS313 |                        |
| pLP135  | vector <i>LEU2</i> 2 $\mu$            | YEP351 |                        |
| pLP1640 | <i>GCN5 URA3</i> CEN                  |        | S. Lo                  |
| pLP1775 | <i>HHT2-HHF2 TRP1</i> CEN             |        | S.L. Berger            |
| pLP1777 | <i>hht2-K14A HHF2 TRP1</i> CEN        |        | S. Lo                  |
| pLP1823 | vector <i>TRP1</i> 2 $\mu$            | pRS424 | C. Nislow              |
| pLP1950 | <i>gcn5-KQL LEU2</i> 2 $\mu$          |        |                        |
| pLP1951 | <i>GAS1 LEU2</i> 2 $\mu$              |        |                        |
| pLP2114 | <i>gas1-E161Q, E262Q LEU2</i> 2 $\mu$ |        |                        |
| pLP3018 | <i>hht2-K14R HHF2 TRP1</i> CEN        |        |                        |
| pLP3050 | <i>hht2-K23R HHF2 TRP1</i> CEN        |        |                        |
| pLP3064 | <i>hht2-K14R, K23R HHF2 TRP1</i> CEN  |        |                        |
| pLP3078 | <i>hht2-K14A, K23A HHF2 TRP1</i> CEN  |        |                        |
| pLP3086 | <i>hht2-K23A HHF2 TRP1</i> CEN        |        |                        |
| pLP3145 | <i>HHT1-HHF1 URA3</i> CEN             |        |                        |

All plasmids were constructed during the course of this study or are part of our standard lab collection unless otherwise indicated.
